# Supplementary material for: Disruption of the Hepcidin/Ferroportin Regulatory System Causes Pulmonary Iron Overload and Restrictive Lung Disease
Source: PubMed Central journal article supplement — eBioMedicine. 2017 Apr 29;20:230–9. doi: 10.1016/j.ebiom.2017.04.036 (PMC5478206; doi:10.1016/j.ebiom.2017.04.036), 2017-04-29
Supplement: mmc1.pdf [file mmc1.pdf]

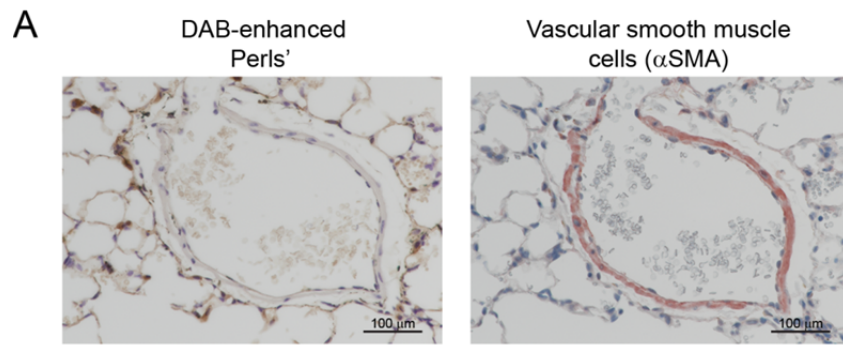

Figure S1

**Figure S1 – Pulmonary vascular smooth muscle cell layers in *Slc40a1*<sup>C326S/C326S</sup> mice.** A) DAB-enhanced Perls' staining (left) and immunohistochemistry for alpha smooth muscle actin ( $\alpha$ SMA) (right) of consecutive lung sections from *Slc40a1*<sup>C326S/C326S</sup> female 36-week old mice.

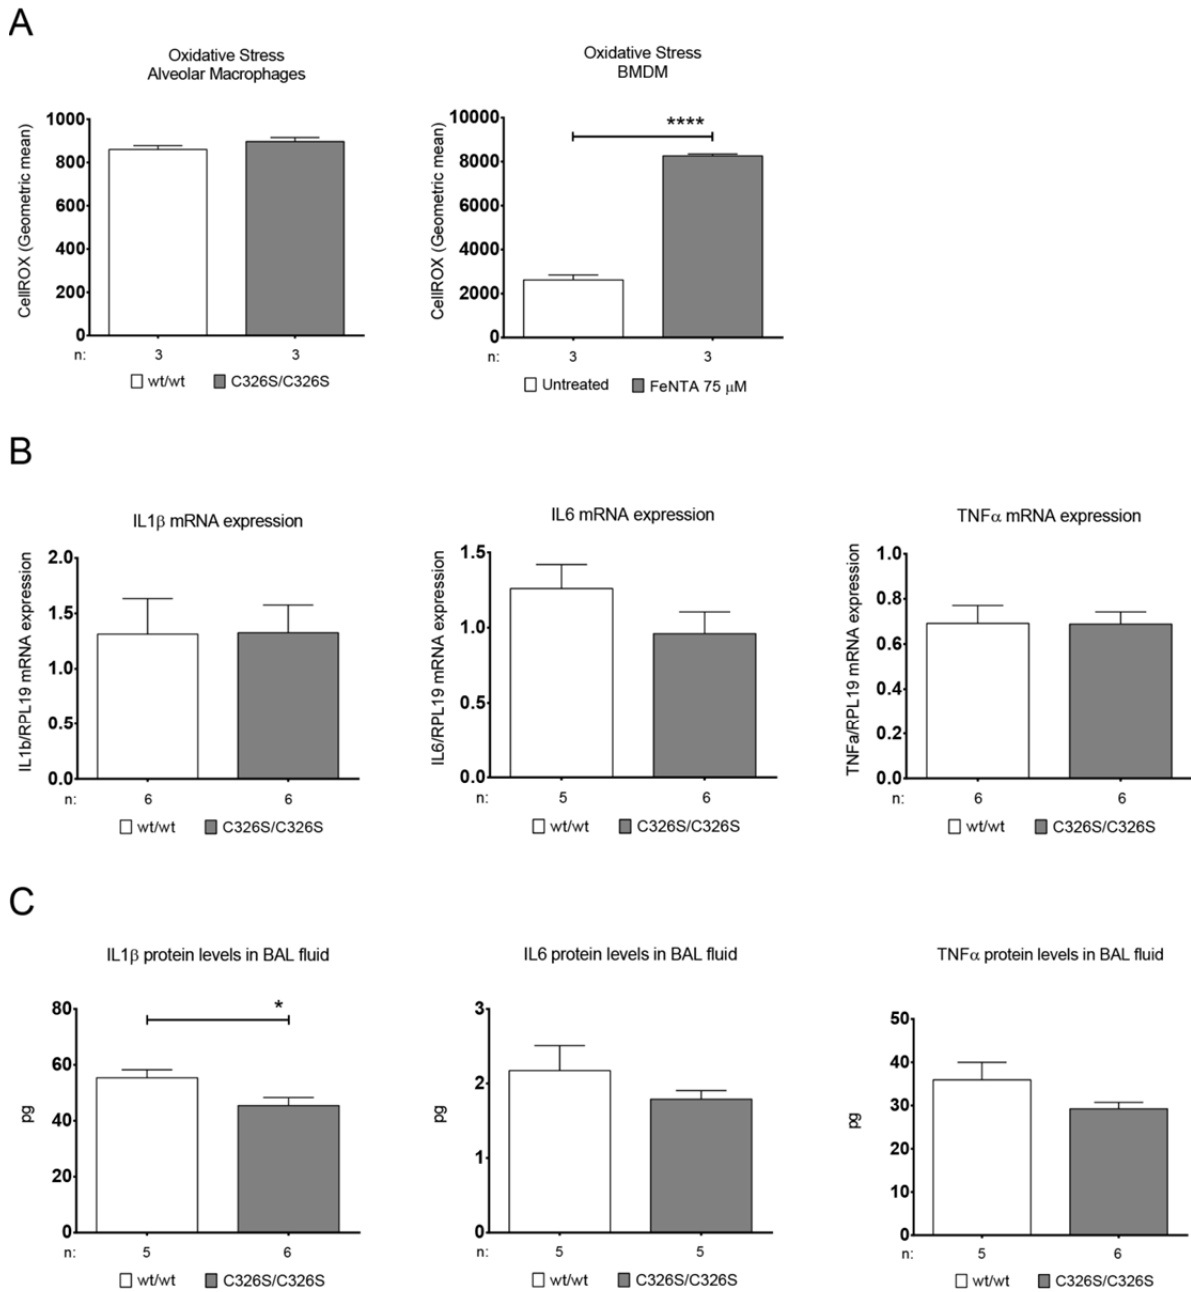

**Figure S2**

**Figure S2 – *Slc40a1*<sup>C326S</sup> mice do not show signs of pulmonary inflammation.** A) FACS analysis of the CellIROX oxidative stress tracer of iron treated BMDM or AM isolated from the BAL of 24-week old male mice. B) qRT-PCR analysis of IL1β, IL6 and TNFα mRNA expression in total lung from female 36-week old mice. C) Luminex analysis of IL1β, IL6 and TNFα protein levels in the BAL fluid supernatant of female 36-week old mice. Data are reported as mean ± SEM. Student's t test: \*p < 0.05; \*\*p < 0.01; \*\*\*p < 0.001; \*\*\*\*p < 0.0001.

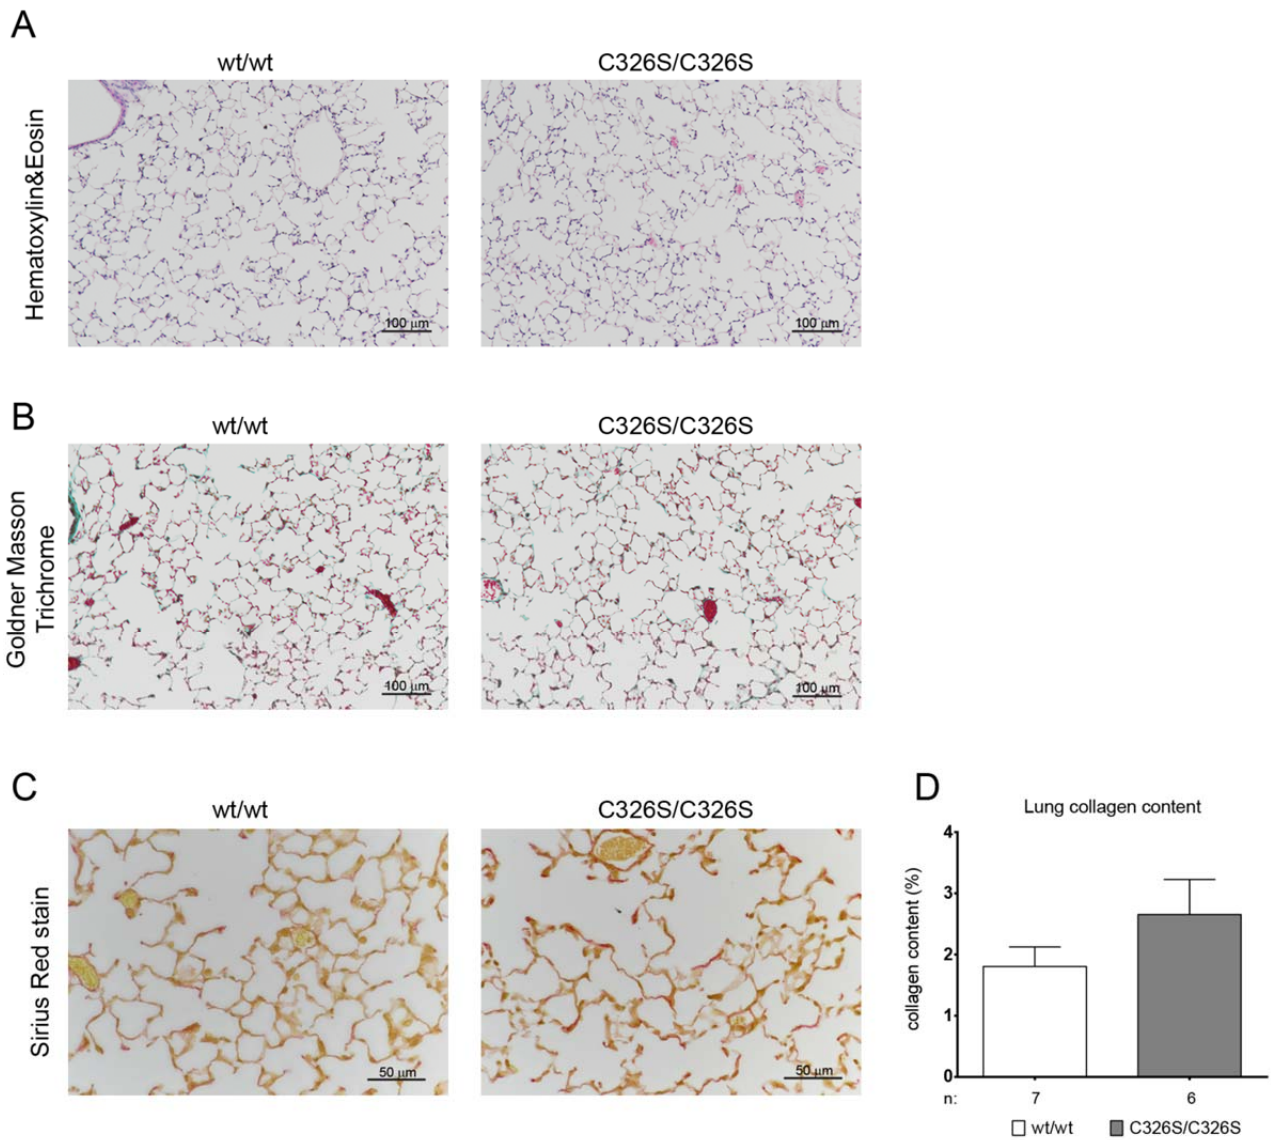

**Figure S3**

**Figure S3 – The lung structure in *Slc40a1*<sup>C326S/C326S</sup> mice is unaltered compared to wild-type mice.**  
 A) Hematoxylin & Eosin stain of lung sections from 36-week old mice. B) Goldner Masson Trichrome stain of lung sections from 36-week old mice. C) Sirius Red stain of lung sections from 36-week old mice. D) Collagen content calculated on Sirius Red stained lung sections from 34-week old mice.

A

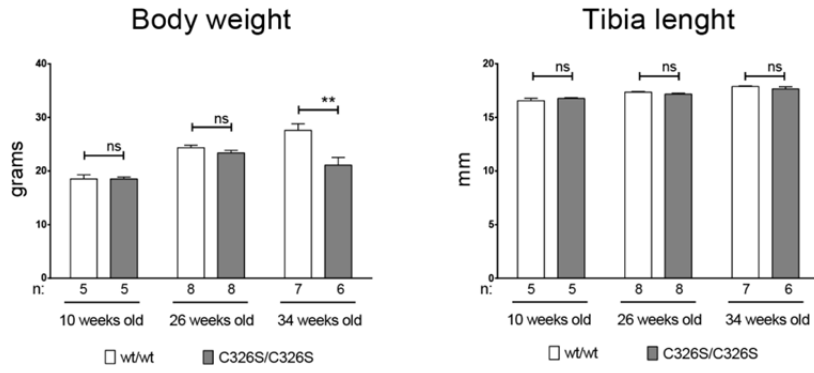

Figure S4

Figure S4 – Reduced body weight but similar tibia length in 34-week old *Slc40a1*<sup>C326S/C326S</sup> mice compared to wild-type mice. A) Body weight and tibia length of 10-, 26- and 34-week old mice.

A

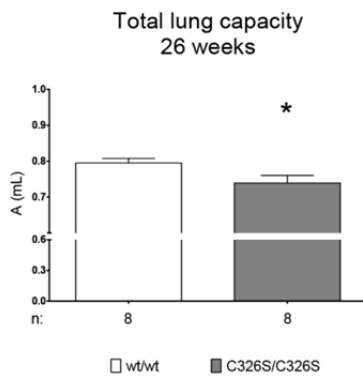

Figure S5

Figure S5 – (A) Total lung capacity measured in 26-week old female mice.

**Table S1 – Hematological parameters in 36-week old mice**

| Parameter                             | wt/wt        | n | C326S/C326S  | n | p-value    |
|---------------------------------------|--------------|---|--------------|---|------------|
| Hemoglobin (g/dl)                     | 16,36 ± 0,06 | 4 | 17,66 ± 0,41 | 4 | * 0,0199   |
| Hematocrit (%)                        | 53,22 ± 0,53 | 4 | 56,73 ± 1,12 | 4 | * 0,0296   |
| Red blood cells (10 <sup>6</sup> /μL) | 10,60 ± 0,09 | 4 | 11,47 ± 0,05 | 4 | *** 0,0002 |

Data are reported as mean ± SEM

**SYBR green qPCR primers**

|          | Primer Forward            | Primer Reverse           |
|----------|---------------------------|--------------------------|
| TfR1     | CCCATGACGTTGAATTGAACCT    | GTAGTCTCCACGAGCGGAATA    |
| DMT1-IRE | AGCTAGGGCATGTGGCACTCT     | ATGTTGCCACCGCTGGTATC     |
| FPN      | TGTCAGCCTGCTGTTTGCAGGA    | TCTTGCAGCAACTGTGTCACCG   |
| HO1      | AGGCTAAGACCGCCTTCCT       | TGTGTTCTCTGTCAGCATCA     |
| RPL19    | AGGCATATGGGCATAGGGAAGAG   | TTGACCTTCAGGTACAGGCTGTG  |
| TNFα     | TGCCTATGTCTCAGCCTCTTC     | GAGGCCATTTGGGAAGTCTCT    |
| IL1β     | GCAACTGTTCTGAACTCAACT     | ATCTTTTGGGGTCCGTCAACT    |
| IL6      | GCTACCAAAGTGGATATAATCAGGA | CCAGGTAGCTATGGTACTCCAGAA |

**Antibodies used for Western Blotting (WB), immunohistochemistry (IHC) and immunocytochemistry (ICC)**

| Antigen      | Host   | WB<br>dilution | IHC<br>dilution | ICC<br>dilution | Reference/Supplier         |
|--------------|--------|----------------|-----------------|-----------------|----------------------------|
| FPN          | rabbit | 1:500          | /               | 1:200           | MTP11-A / Alphadiagnostics |
| DMT1         | rabbit | /              | 1:100           | /               | (Galy et al., 2008)        |
| FtL          | goat   | 1:500          | /               | /               | sc-14420 / SCBT            |
| TfR1         | mouse  | 1:1000         | /               | /               | 136800 / Invitrogen        |
| β-actin      | mouse  | 1:5000         | /               | /               | A1978 / Sigma-Aldrich      |
| β-tubulin IV | mouse  | /              | 1:500           | /               | MU178-UC / Biogenex        |
| proSP-C      | rabbit | /              | 1:5000          | /               | ab28744-50 / Abcam         |
| αSMA         | rabbit | /              | 1:300           | /               | ab5694 / Abcam             |

### Antibodies used for Flow cytometry

| Antigen | Dilution | Reference/Supplier     |
|---------|----------|------------------------|
| CD45.2  | 1/200    | 109820 / Biolegend     |
| CD11c   | 1/200    | 550261 / BD Pharmingen |
| SiglecF | 1/200    | 552126 / BD Pharmingen |

### Supplementary references:

Galy, B., Ferring-Appel, D., Kaden, S., Grone, H.J., and Hentze, M.W. (2008). Iron regulatory proteins are essential for intestinal function and control key iron absorption molecules in the duodenum. *Cell Metab* 7, 79-85.
